# Supplementary material
Source: PubMed Central journal article supplement (PMC7534454)

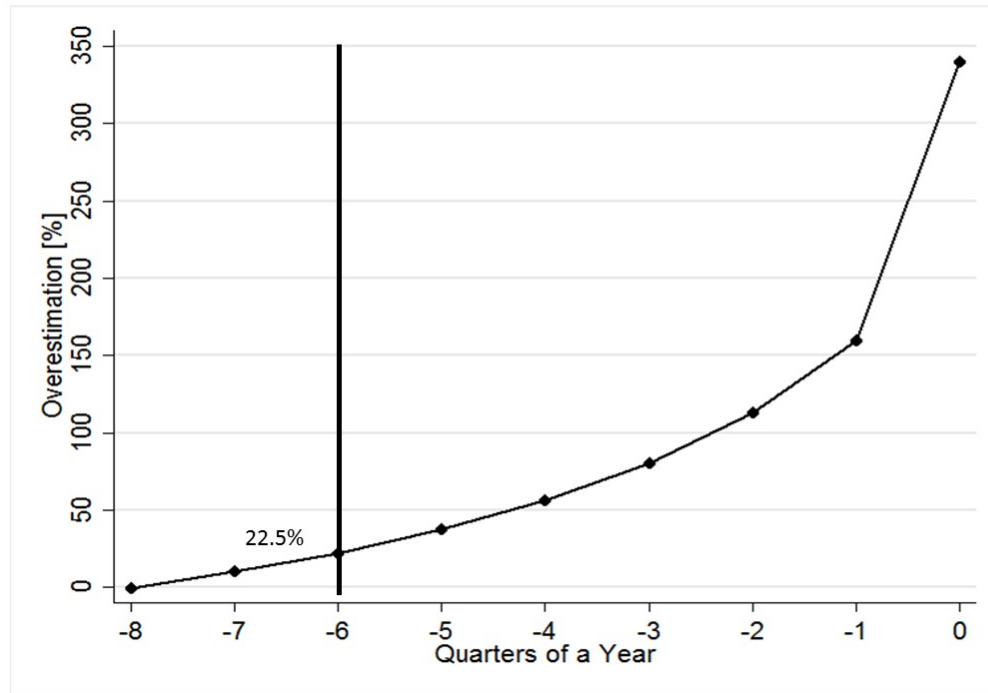

Supplement: izz092_suppl_supplementary_figure_1.pdf [file izz092_suppl_supplementary_figure_1.pdf]
